# Supplementary material for: Click-based amplification: designed to facilitate various target labelling modes with ultralow background amplification
Source: PubMed Central journal article supplement (PMC8341700; doi:10.1039/d1cb00002k), 2021-03-20
Supplement: CB-002-D1CB00002K-s001.pdf [file CB-002-D1CB00002K-s001.pdf]

## Click-based amplification: designed to facilitate various target labelling with ultralow background

Jinyi Bai, Fusheng Guo, Mengyao Li, Yulong Li\* and Xiaoguang Lei\*

### Supplementary Information

#### Table of Contents

|                                                                                                     |    |
|-----------------------------------------------------------------------------------------------------|----|
| Supplementary Information.....                                                                      | 1  |
| Fig. S1 CuAAC-type converter showed ultralow nonspecific amplification.....                         | 2  |
| Fig. S2 Quantification of the amount of modifications on streptavidin.....                          | 3  |
| Fig. S3 Optimization of Click-based amplification conditions in context of fixed HeLa cell.....     | 4  |
| Fig. S4 An instance of how cells were chosen randomly for fluorescence quantification.....          | 5  |
| Fig. S5 A repeated amplification experiment of NHS-N <sub>3</sub> labelling in HeLa cells.....      | 6  |
| Fig. S6 Optimization of the click conversion of EdU labelling in HeLa cells.....                    | 7  |
| Fig. S7 Optimization of the concentration of SA-HRP for TSA Amplification.....                      | 8  |
| Table S1 Raw data for Fig. 4E with Click-based Amplification.....                                   | 8  |
| Fig. S8 A repeated amplification experiment of Afatinib-N <sub>3</sub> labelling in HeLa cells..... | 9  |
| Fig. S9 Synthesis of NHS-N <sub>3</sub> (2) .....                                                   | 10 |
| Fig. S10 Synthesis of NHS-pAz (6) .....                                                             | 10 |
| Fig. S11 Synthesis of Biotin-PEG <sub>2</sub> -DIBO (10) .....                                      | 11 |
| Fig. S12 Synthesis of Biotin-N <sub>3</sub> (13).....                                               | 12 |
| Fig. S13 <sup>1</sup> H NMR spectrum of NHS-N <sub>3</sub> (2) .....                                | 13 |
| Fig. S14 <sup>13</sup> C NMR spectrum of NHS-N <sub>3</sub> (2) .....                               | 14 |
| Fig. S15 <sup>1</sup> H NMR spectrum of NHS-pAz (6) .....                                           | 15 |
| Fig. S16 <sup>1</sup> H NMR spectrum of Biotin-PEG <sub>2</sub> -DIBO (10) .....                    | 16 |
| Fig. S17 <sup>1</sup> H NMR spectrum of Biotin-N <sub>3</sub> (13).....                             | 17 |
| Fig. S18 <sup>13</sup> C NMR spectrum of Biotin-N <sub>3</sub> (13).....                            | 18 |
| Supplementary References.....                                                                       | 18 |

Fig. S1 CuAAC-type converter showed ultralow nonspecific amplification.

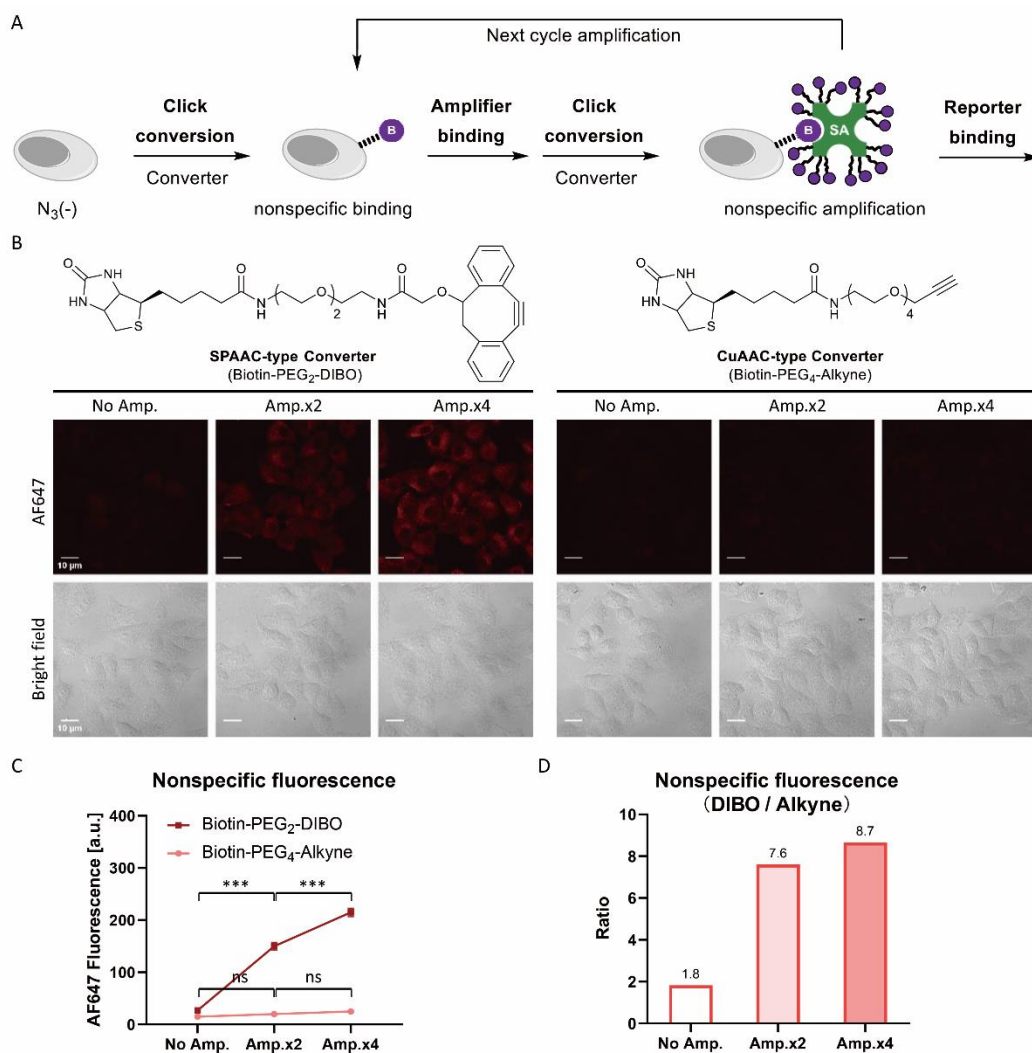

Fig. S1 CuAAC-type converter showed ultralow nonspecific amplification. (A) Scheme of nonspecific amplification evaluation of Click-based amplification. Amplification was performed on fixed cell without any click-labelling. (B) SPAAC-type converter Biotin-PEG<sub>2</sub>-DIBO introduced much stronger nonspecific fluorescence than CuAAC-type converter Biotin-PEG<sub>4</sub>-Alkyne. Amp.x2 and Amp.x4 represent Click-based amplifications were carried out twice and four times before reporter binding, respectively. (C) Fluorescence quantification of confocal imaging in (B) with ImageJ. Dark red line represents the cellular fluorescence intensity using Biotin-PEG<sub>2</sub>-DIBO, and each data point is the average fluorescence intensity of 16 cells chosen randomly from the microscope imaging. Light red line represents the cellular fluorescence intensity using Biotin-PEG<sub>4</sub>-Alkyne, and each data point is the average fluorescence intensity of 16 cells chosen randomly from the microscope imaging. Error bar: the standard error (SE). (D) Ratios of nonspecific fluorescence with Biotin-PEG<sub>2</sub>-DIBO to Biotin-PEG<sub>4</sub>-Alkyne. Scale bar, 10  $\mu$ m. \*\*\* =  $p < 0.001$ , ns = no significant.

**Fig. S2 Quantification of the amount of modifications on streptavidin.**

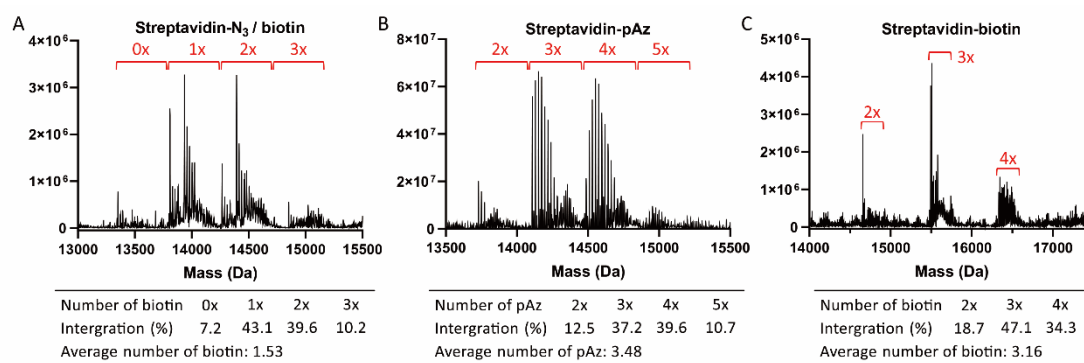

Fig. S2 Quantification of the amount of modifications on streptavidin. (A) Up: the deconvoluted ESI-TOF mass spectra of Streptavidin-N<sub>3</sub> / biotin (Figure 2E); down: the integral area (%) of MS peaks and the calculated number of biotin tags. (B) Up: the deconvoluted ESI-TOF mass spectra of Streptavidin-pAz (Figure 2F); down: the integral area (%) of MS peaks and the calculated number of pAz tags. (C) Up: the deconvoluted ESI-TOF mass spectra of Streptavidin-biotin (Figure 2G); down: the integral area (%) of MS peaks and the calculated number of biotin tags.

**Fig. S3 Optimization of Click-based amplification conditions in context of fixed HeLa cell.**

To obtain better amplification efficiency in cell imaging, we optimized the reaction conditions in the context of fixed HeLa cells, which were labelled with 1  $\mu\text{M}$  of NHS-N<sub>3</sub> on ice for 30 min and fixed with PFA (Fig. S3A). The results showed that in amplifier binding step, 0.1-0.5  $\mu\text{g}\cdot\text{mL}^{-1}$  of streptavidin-pAz obtained best amplification efficiency and signal-to-noise ratio (Fig. S3B), and BSA blocking had no significant improvement for amplification (Fig. S3C). In click conversion step, the optimized concentrations of biotin-PEG<sub>4</sub>-alkyne and copper catalyst were 10  $\mu\text{M}$  and 100  $\mu\text{M}$ , respectively (Fig. S3D and S3E).

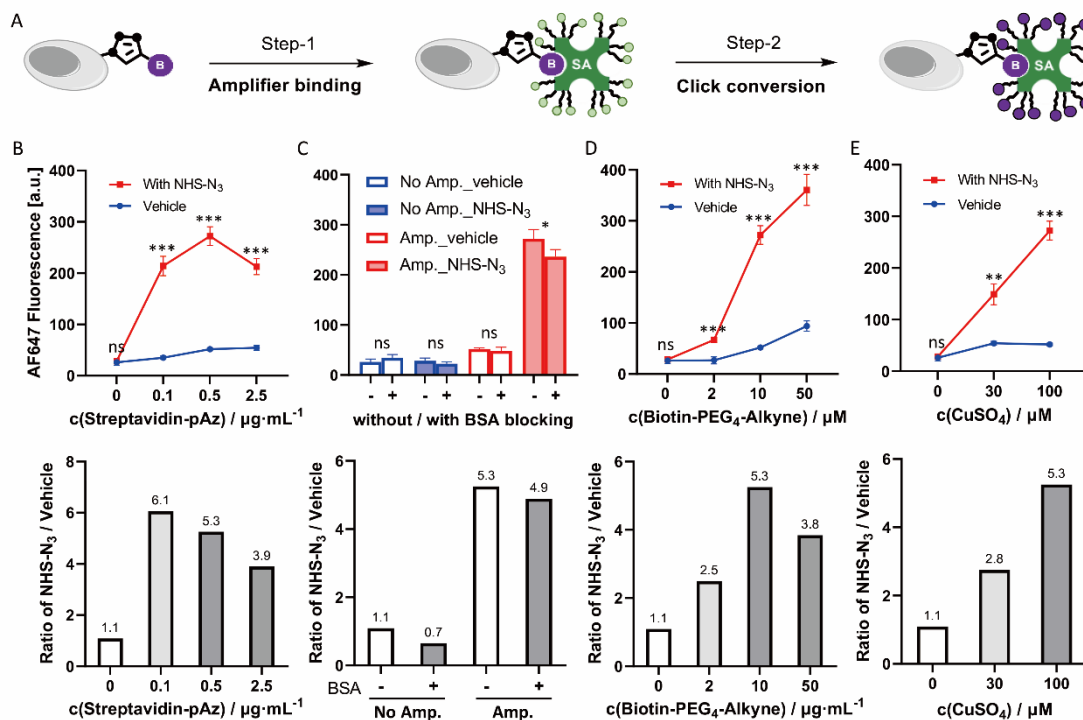

Fig. S3 Optimization of Click-based amplification conditions in context of fixed HeLa cell. (A) Scheme of Click-based amplification. HeLa cell was treated with 1  $\mu\text{M}$  of NHS-N<sub>3</sub> on ice for 30 min, and then fixed with 4% PFA. Click conversion of labelled N<sub>3</sub> to biotin was performed before Click-based amplification. (B) Amplifier binding step with a concentration gradient of streptavidin-pAz from 0.1  $\mu\text{g}/\text{mL}$  to 2.5  $\mu\text{g}/\text{mL}$ . Up, quantification of cellular AF647 fluorescence intensity of fixed HeLa cells with and without NHS-N<sub>3</sub> treatment, and each data point is the average fluorescence intensity of 20 cells chosen randomly from the microscope imaging. Error bar: the standard error (SE). Down, ratios of cellular AF647 fluorescence with NHS-N<sub>3</sub> treatment to vehicle control. (C) Amplifier binding were performed with and without BSA blocking. (D) Click conversion step with a concentration gradient of Biotin-PEG<sub>4</sub>-Alkyne from 2  $\mu\text{M}$  to 50  $\mu\text{M}$ . (E) Click conversion step with a concentration gradient of CuSO<sub>4</sub> catalyst from 30  $\mu\text{M}$  to 100  $\mu\text{M}$ , and 200  $\mu\text{M}$  of BTAA was added as the ligand of copper. (B)-(E) share the same fluorescence quantification methods. \*\*\* =  $p < 0.001$ , \*\* =  $p < 0.01$ , ns = no significant.

**Fig. S4 An instance of how cells were chosen randomly for fluorescence quantification.**

Take the microscope imaging in Figure 3A (1  $\mu\text{M}$  of NHS- $\text{N}_3$ , Amp.) as an example. Two microscope images were acquired for one testing sample, and one image (Field 2) was present in Figure 3A. Ten cells and one background field were chosen randomly from each image. First, open nd2 files with ImageJ and switch to AF647 channel (Fig. S4A). The image contrast was adjusted to show the edges of HeLa cells clearly using Image -> Adjust -> Brightness/Contrast -> Set (Fig. S4B). Circle one cell along its edge using Freehand selections, then quantify the fluorescence intensity using Analyze -> Measure, and write down the Mean value. Repeat this step to quantify the fluorescence intensity of 20 cells and 2 background fields (Fig. S4C). To minimize the artificial deviation, one can select cells in bright field channel first, and then quantify the fluorescence intensity of selected cells in AF647 channel.

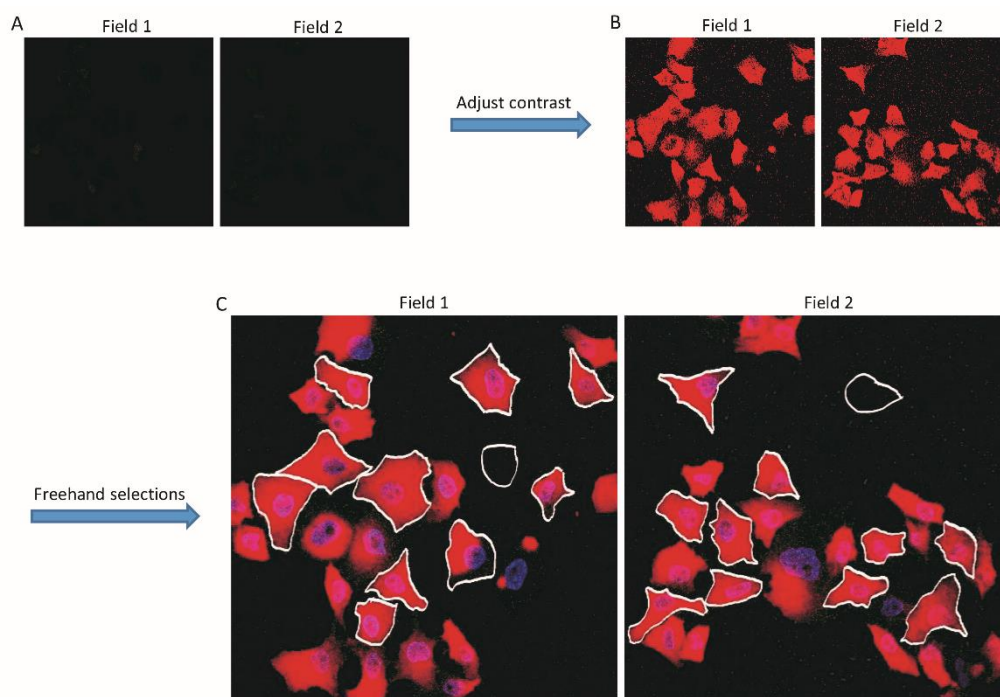

Fig. S4 An instance of how cells were chosen randomly for fluorescence quantification. (A) Open nd2 files with ImageJ and switch to AF647 channel. (B) The image contrast was adjusted to show the edges of HeLa cells clearly using Image -> Adjust -> Brightness/Contrast -> Set. (C) Circle one cell along its edge using Freehand selections, then quantify the fluorescence intensity using Analyze -> Measure, and write down the Mean value. Repeat this step to quantify the fluorescence intensity of 20 cells and 2 background fields.

Fig. S5 A repeated amplification experiment of NHS-N<sub>3</sub> labelling in HeLa cells.

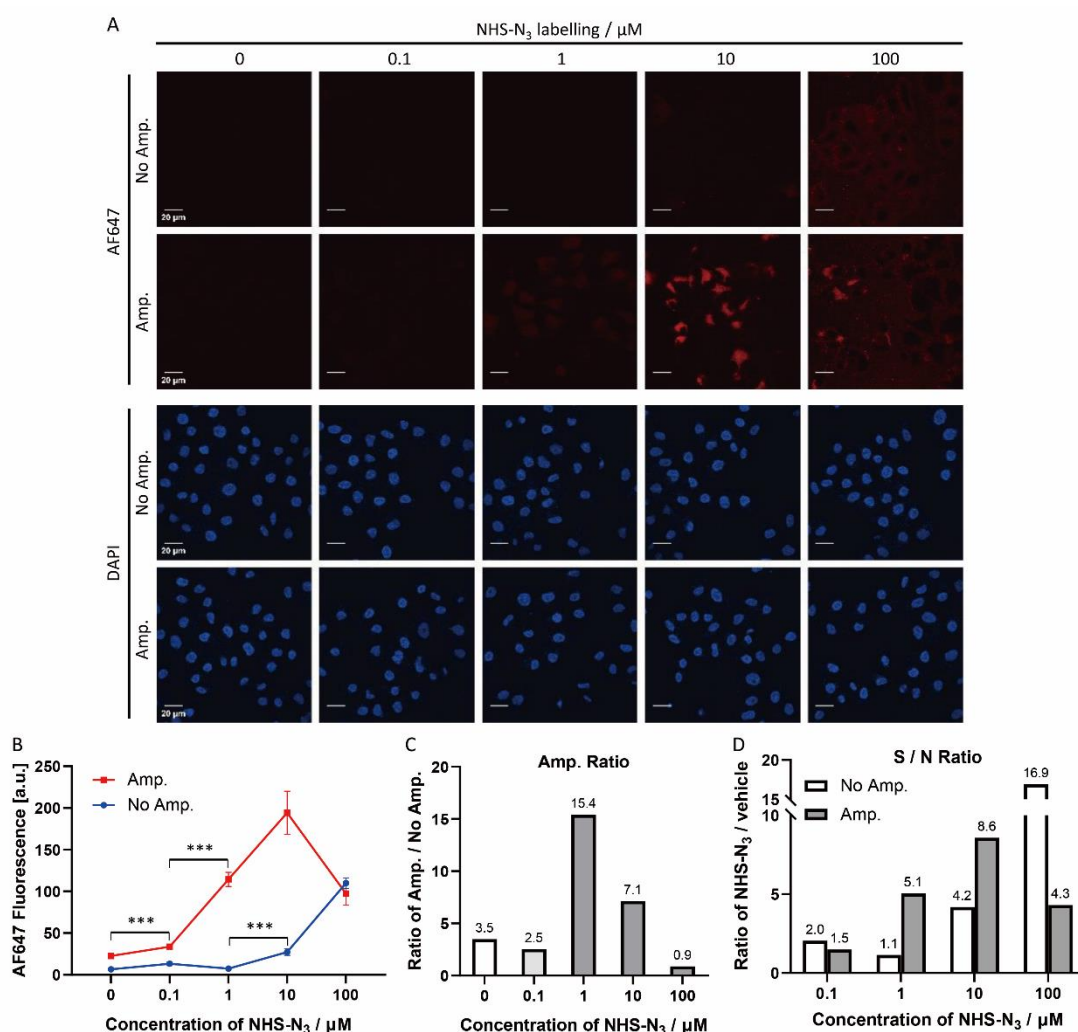

Fig. S5 A repeated amplification experiment of NHS-N<sub>3</sub> labelling in HeLa cells. (A) Confocal imaging of fixed HeLa cells without and with Click-based amplification (No Amp. and Amp.). HeLa cells were treated with a concentration gradient of NHS-N<sub>3</sub> from 0.1  $\mu\text{M}$  to 100  $\mu\text{M}$ . DAPI indicated the nucleus of the HeLa cell. Scale bar, 20  $\mu\text{m}$ . (B) Quantification of cellular AF647 fluorescence intensity in (A) with ImageJ. Red line represents the fluorescence intensity of HeLa cells with Click-based amplification (Amp.), and each data point is the average fluorescence intensity of 20 cells chosen randomly from the microscope imaging. Blue line, the fluorescence intensity of HeLa cells without Click-based amplification (No Amp.). Error bar: the standard error (SE). \*\*\* =  $p < 0.001$ . (C) Amplification ratios (Amp. / No Amp.). (D) Signal-to-noise ratios (NHS-N<sub>3</sub> / vehicle).

**Fig. S6 Optimization of the click conversion of EdU labelling in HeLa cells.**

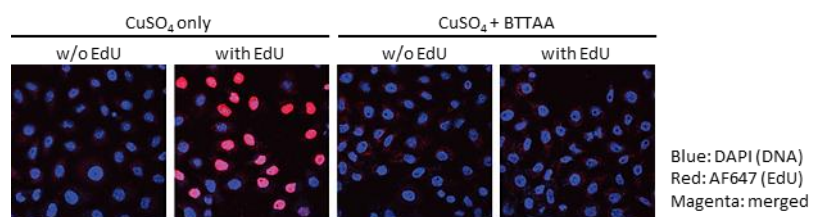

Fig. S6 Optimization of the click conversion of EdU labelling in HeLa cells. Merged confocal imaging of fixed HeLa cells with EdU labelling: blue channel indicated the nucleus of the HeLa cell stained with DAPI, red channel indicated the signal of EdU labelling after click reaction with biotin-N<sub>3</sub> and coupling with streptavidin-AF647, and magenta channel indicated the colocalization of EdU labelling with DNA. Click condition: 10  $\mu$ M of biotin-N<sub>3</sub>, 100  $\mu$ M of CuSO<sub>4</sub>, and 2.5 mM of sodium ascorbate in PBS, with or without 200  $\mu$ M of BTAA. The strong AF647 fluorescence signal showed click conversion of EdU occurred with CuSO<sub>4</sub> only, while BTAA slowed down the click conversion of EdU in HeLa cells.

**Fig. S7 Optimization of the concentration of SA-HRP for TSA Amplification.**

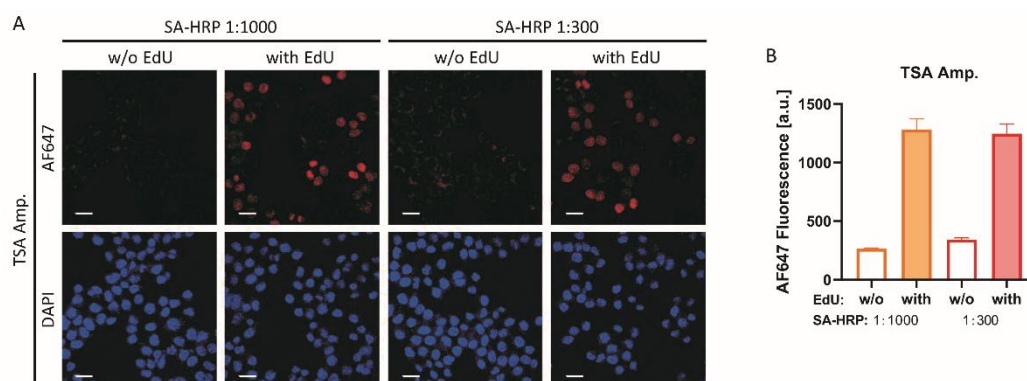

Fig. S7 Optimization of the concentration of SA-HRP for TSA Amplification. (A) Confocal imaging of fixed HeLa cells with TSA amplification. The concentrations of SA-HRP used in TSA were 1:1000 and 1:300. HeLa cells were treated with 10  $\mu$ M of EdU in DMEM at 37  $^{\circ}$ C for overnight. DAPI indicated the nucleus of the HeLa cell. (B) Quantification of cell fluorescence intensity in (A). For w/o EdU groups, all the cell nuclei were dark, and 20 cells was chosen randomly to average the fluorescence intensity. For with EdU groups, all the lighted nuclei were measured to average the fluorescence intensity. Scale bar, 20  $\mu$ m.

**Table S1 Raw data for Figure 4E with Click-based Amplification.**

**1. No Amp., w/o EdU. 20 cells were chosen randomly**

|                                   |         |         |         |            |         |         |         |         |         |
|-----------------------------------|---------|---------|---------|------------|---------|---------|---------|---------|---------|
| 131.363                           | 130.946 | 128.574 | 128.685 | 127.911    | 128.698 | 129.100 | 129.268 | 128.685 | 127.652 |
| 127.008                           | 127.838 | 128.464 | 129.071 | 128.562    | 127.641 | 127.833 | 126.917 | 130.144 | 127.170 |
| <b>Background fluorescence:</b>   |         |         | 122.782 | 122.782    |         |         |         |         |         |
| <b>Average cell fluorescence:</b> |         |         | 5.776   | <b>SE:</b> | 0.268   |         |         |         |         |

**2. No Amp., with EdU. All the 30 lighted nuclei were measured**

|                                      |         |         |         |         |            |         |         |         |         |
|--------------------------------------|---------|---------|---------|---------|------------|---------|---------|---------|---------|
| 927.431                              | 838.826 | 515.415 | 510.300 | 608.226 | 488.072    | 483.097 | 598.771 | 217.883 | 812.801 |
| 178.631                              | 244.523 | 454.518 | 534.803 | 375.194 | 370.170    | 518.715 | 200.634 | 819.384 | 664.945 |
| 707.290                              | 423.331 | 446.265 | 360.919 | 515.551 | 164.510    | 394.086 | 385.945 | 182.400 | 173.602 |
| <b>Background fluorescence:</b>      |         |         | 122.937 | 122.884 |            |         |         |         |         |
| <b>Average nucleus fluorescence:</b> |         |         |         | 347.631 | <b>SE:</b> | 38.805  |         |         |         |

**3. Click-based Amp., w/o EdU. 20 cells were chosen randomly**

|                                   |         |         |         |            |         |         |         |         |         |
|-----------------------------------|---------|---------|---------|------------|---------|---------|---------|---------|---------|
| 160.393                           | 157.850 | 158.752 | 156.972 | 163.897    | 153.454 | 158.268 | 154.688 | 152.930 | 151.186 |
| 149.104                           | 149.184 | 147.035 | 146.613 | 146.218    | 149.853 | 145.443 | 152.876 | 156.519 | 149.396 |
| <b>Background fluorescence:</b>   |         |         | 123.942 | 124.038    |         |         |         |         |         |
| <b>Average cell fluorescence:</b> |         |         | 29.042  | <b>SE:</b> | 5.028   |         |         |         |         |

**4. Click-based Amp., with EdU. All the 21 lighted nuclei were measured**

|                                      |          |          |          |          |            |          |         |          |          |
|--------------------------------------|----------|----------|----------|----------|------------|----------|---------|----------|----------|
| 1765.350                             | 1704.599 | 1219.683 | 1762.522 | 1618.057 | 1890.259   | 1923.729 | 472.715 | 1380.003 | 1279.158 |
| 1139.309                             | 1092.736 | 1162.938 | 1439.554 | 549.516  | 777.380    | 579.032  | 433.045 | 927.051  | 980.657  |
| 567.945                              |          |          |          |          |            |          |         |          |          |
| <b>Background fluorescence:</b>      |          |          | 123.413  | 123.170  |            |          |         |          |          |
| <b>Average nucleus fluorescence:</b> |          |          |          | 1051.244 | <b>SE:</b> | 106.812  |         |          |          |



Fig. S8 A repeated amplification experiment of Afatinib-N<sub>3</sub> labelling in HeLa cells.

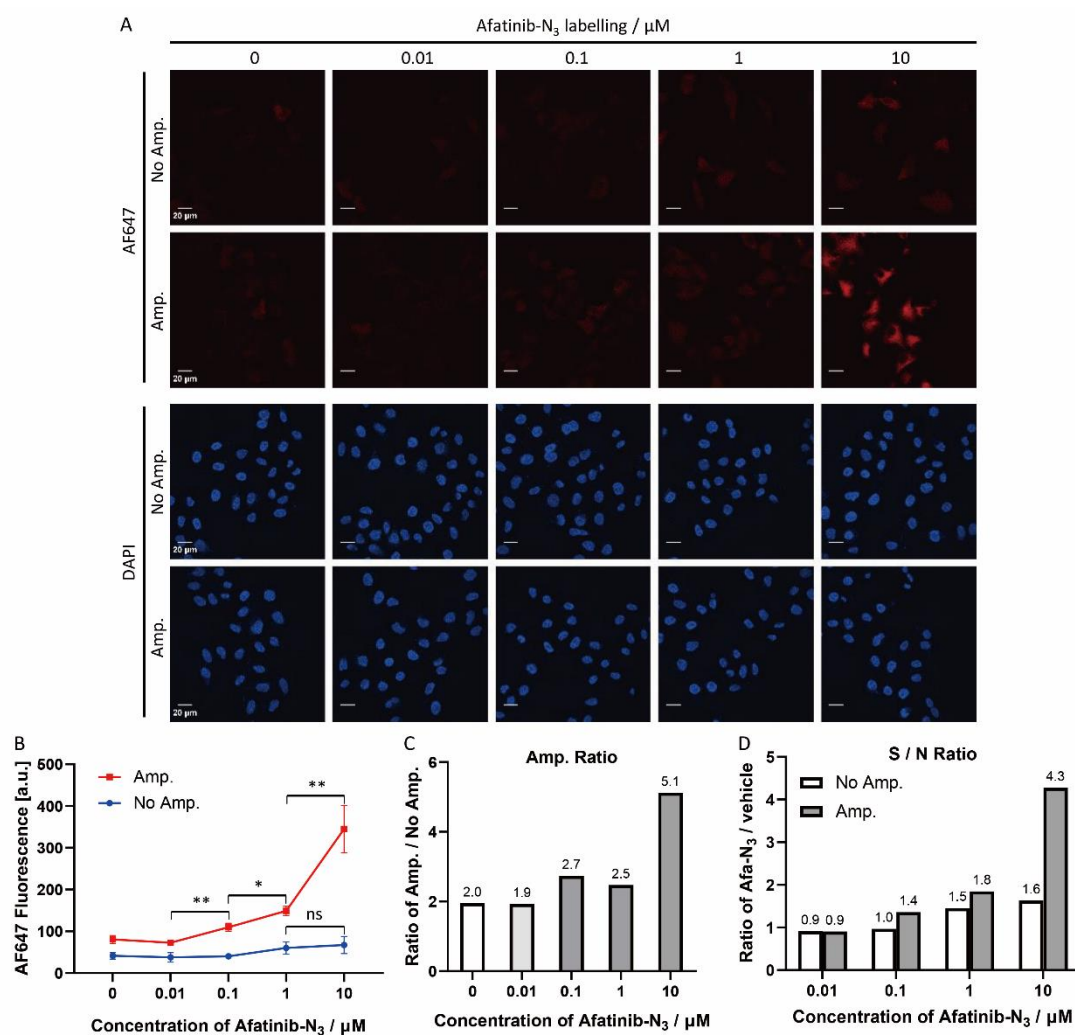

Fig. S8 A repeated amplification experiment of Afatinib-N<sub>3</sub> labelling in HeLa cells. (A) Confocal imaging of fixed HeLa cells without and with Click-based amplification (No Amp. and Amp.). HeLa cells were treated with a concentration gradient of Afatinib-N<sub>3</sub> from 0.01  $\mu\text{M}$  to 10  $\mu\text{M}$  in DMEM at 37  $^{\circ}\text{C}$  for 1 h. DAPI indicated the nucleus of the HeLa cell. Scale bar, 20  $\mu\text{m}$ . (B) Quantification of cellular AF647 fluorescence intensity in (A) with ImageJ. Red line represents the fluorescence intensity of HeLa cells with Click-based amplification (Amp.), and each data point is the average fluorescence intensity of 20 cells chosen randomly from the microscope imaging. Blue line, the fluorescence intensity of HeLa cells without Click-based amplification (No Amp.). Error bar: the standard error (SE). \*\* =  $p < 0.005$ , \* =  $p < 0.05$ , ns = no significant. (C) Amplification ratios (Amp. / No Amp.). (D) Signal-to-noise ratios (Afatinib-N<sub>3</sub> / vehicle).

Fig. S9 Synthesis of NHS-N<sub>3</sub> (2)

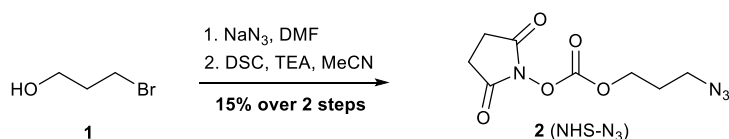

Fig. S9 Synthesis of NHS-N<sub>3</sub> 2.

**3-azidopropyl (2,5-dioxopyrrolidin-1-yl) carbonate (2)** was synthesized following the methodology developed by F.C. Wu et al.<sup>1</sup> 3-Bromopropan-1-ol **1** (226  $\mu$ L, 2.5 mmol) was added to a stirred solution of NaN<sub>3</sub> (230 mg, 3.75 mmol) in dry DMF (5 mL). The reaction mixture was stirred at room temperature for 1 d, and then 25 mL of Et<sub>2</sub>O/*n*-hexane (1:1) was added. The organic phase was washed with brine, and dried over anhydrous Na<sub>2</sub>SO<sub>4</sub>. After filtration, the filtrate was concentrated *in vacuo*. The crude intermediate 3-azidopropan-1-ol was used in next step without further purification. *N,N'*-disuccinimidyl carbonate (DSC, 0.96 g, 3.75 mmol) was added in one portion to a solution of the crude 3-azidopropan-1-ol ( $\leq$  2.5 mmol) in dry MeCN (10 mL), then triethylamine (TEA, 1.04 mL, 7.5 mmol) was added dropwise. The reaction mixture was stirred at room temperature for 40 min. The solvent was removed *in vacuo*, and the residue was redissolved in ethyl acetate (50 mL). The organic phase was washed with sat. NaHCO<sub>3</sub> and brine, and dried over anhydrous Na<sub>2</sub>SO<sub>4</sub>. After filtration, the filtrate was concentrated *in vacuo*. The residue was purified by column chromatography with silica gel (20%-50% ethyl acetate in petroleum ether) to afford compound **2** (92.8 mg, 15% over two steps) as a colorless oil; <sup>1</sup>H NMR (400 MHz, CDCl<sub>3</sub>)  $\delta$ (ppm) 4.42 (t, 2H, *J* = 6.1 Hz), 3.47 (t, 2H, *J* = 6.6 Hz), 2.84 (s, 4H), 2.01 (m, 2H); <sup>13</sup>C NMR (101 MHz, CDCl<sub>3</sub>)  $\delta$ (ppm) 168.6, 151.5, 68.1, 47.5, 28.0, 25.5; HRMS: [M+H]<sup>+</sup> calculated for C<sub>8</sub>H<sub>11</sub>N<sub>4</sub>O<sub>5</sub> 243.0724, found 243.0720.

Fig. S10 Synthesis of NHS-pAz (6)

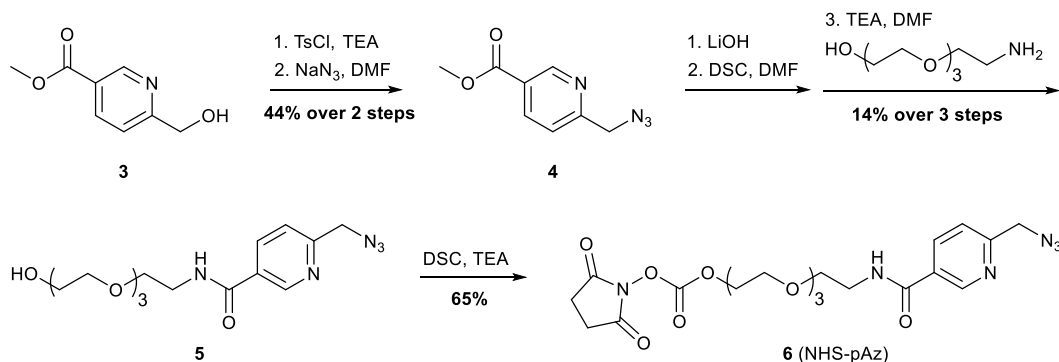

Fig. S10 Synthesis of NHS-pAz 6.

**Methyl 5-(azidomethyl)nicotinate (4)** was synthesized following the methodology developed by Uttamapinant et al.<sup>2</sup> Paratoluenesulfonyl chloride (TsCl, 2.74 g, 14.4 mmol) and TEA (6.65 mL, 47.9 mmol) was added slowly to a solution of methyl 6-(hydroxymethyl)nicotinate **3** (1.60 g, 9.6 mmol) in dry CH<sub>2</sub>Cl<sub>2</sub> (100 mL). The reaction was stirred at room temperature for 3 h, and then CH<sub>2</sub>Cl<sub>2</sub> was removed *in vacuo*. The residue was redissolved in dry THF (80 mL), and NaN<sub>3</sub> (6.22 g, 96 mmol) was added. The reaction mixture was further stirred at room temperature for 40 h, monitored by LC-MS for a complete conversion. Most solvent was removed *in vacuo*. The residue was redissolved in 100 mL of ethyl acetate/water (1:1). The aqueous layer was further extracted with ethyl acetate three times. The combined organic phase was washed with brine, and dried over anhydrous Na<sub>2</sub>SO<sub>4</sub>. After filtration, the filtrate was concentrated *in vacuo*. The residue was purified by column chromatography with silica gel (5%-15% ethyl acetate in petroleum ether) to afford compound **4** (806.7 mg, 44% over two steps) as a light yellow solid; <sup>1</sup>H NMR (400 MHz, CDCl<sub>3</sub>)  $\delta$ (ppm) 9.19 (d, 1H, *J* = 2.0 Hz), 8.33 (dd, 1H, *J* = 8.5, 2.0 Hz), 7.45 (d, 1H, *J* = 8.5 Hz), 4.58 (s, 2H), 3.96 (s, 3H); <sup>13</sup>C NMR (101 MHz, CDCl<sub>3</sub>)  $\delta$ (ppm) 165.5, 160.1, 150.8, 138.2, 125.3, 121.3, 55.4, 52.5; HRMS: [M+H]<sup>+</sup> calculated for C<sub>8</sub>H<sub>9</sub>N<sub>4</sub>O<sub>2</sub> 193.0720, found 193.0720.

**6-(azidomethyl)-N-(2-(2-(2-(2-hydroxyethoxy)ethoxy)ethoxy)ethyl)nicotinamide (5)** To a solution of **4** (114.0 mg, 0.59 mmol) in

methanol (2.5 mL), was added aqueous solution of LiOH (1.0 M, 1.78 mL). The reaction mixture was stirred at room temperature for 30 min, and then quenched by 60  $\mu$ L of acetic acid (1.05 mmol). The mixture was loaded directly onto a silica gel column equilibrated with ethyl acetate + 1% acetic acid. The intermediate was washed out with ethyl acetate + 1% acetic acid + 4% acetonitrile, and concentrated *in vacuo* to afford a yellow solid. The hydrolyzed intermediate was used in next step without further purification. *N, N'*-disuccinimidyl carbonate (DSC, 302.3 mg, 1.18 mmol) was added in one portion to a solution of the hydrolyzed intermediate ( $\leq 0.59$  mmol) in dry DMF (1.5 mL), then TEA (421.4  $\mu$ L, 3.0 mmol) was added dropwise. The reaction mixture was stirred at room temperature for 3 h. The mixture was diluted with 50 mL of  $\text{CHCl}_3/\text{H}_2\text{O}$  (1:1). The aqueous layer was further extracted with  $\text{CHCl}_3$  three times. The combined organic phase was washed with brine, dried over anhydrous  $\text{Na}_2\text{SO}_4$ , and concentrated *in vacuo*. The ester intermediate was purified by flash column chromatography with silica gel (40% ethyl acetate in petroleum ether) to afford a clear liquid containing DMF. A solution of 2-(2-(2-(2-aminoethoxy)ethoxy)ethoxy)ethan-1-ol (228.0 mg, 1.18 mmol) in DMF (0.5 mL) was added dropwise to the ester intermediate, then TEA (253  $\mu$ L, 1.78 mmol) was added dropwise. The reaction mixture was stirred at room temperature overnight, and then the solvent was removed *in vacuo*, and the resulting residue was purified by column chromatography with silica gel (1%-5% MeOH in  $\text{CH}_2\text{Cl}_2$ ) to afford compound **5** (28.2 mg, 14% over three steps) as a light yellow oil;  $^1\text{H NMR}$  (400 MHz,  $\text{CDCl}_3$ )  $\delta$ (ppm): 9.06 (d, 1H,  $J = 2.0$  Hz), 8.25 (dd, 1H,  $J = 8.5, 2.0$  Hz), 8.16 (s, 1H), 7.42 (d, 1H,  $J = 8.5$  Hz), 4.53 (s, 2H), 3.78-3.57 (m, 14H), 3.55-3.42 (m, 2H); ESI-MS:  $[\text{M}+\text{H}]^+$   $\text{C}_{15}\text{H}_{24}\text{N}_5\text{O}_5$  354.6.

**1-(6-(azidomethyl)pyridin-3-yl)-1-oxo-5,8,11-trioxo-2-azatridecan-13-yl (2,5-dioxopyrrolidin-1-yl) carbonate (6)** *N, N'*-disuccinimidyl carbonate (DSC, 69.5 mg, 0.27 mmol) was added in one portion to a solution of **5** (27.3 mg, 0.077 mmol) in dry MeCN (1.5 mL), then TEA (75  $\mu$ L, 0.54 mmol) was added dropwise. The reaction mixture was stirred at room temperature for 2.5 h. The solvent was removed *in vacuo*, and the residue was purified by column chromatography with silica gel (1%-6% MeOH in  $\text{CH}_2\text{Cl}_2$ ) to afford compound **6** (24.7 mg, 65%) as a thick oil;  $^1\text{H NMR}$  (400 MHz,  $\text{CDCl}_3$ )  $\delta$ (ppm): 9.00 (d, 1H,  $J = 2.0$  Hz), 8.19 (dd, 1H,  $J = 2.3$  Hz, 8.1 Hz), 7.43 (d, 1H,  $J = 8.1$  Hz), 7.09 (s, 1H), 4.54 (s, 2H), 4.44 (m, 2H), 3.75 (m, 2H), 3.71-3.64 (m, 12H), 2.83 (s, 4H); HRMS:  $[\text{M}+\text{H}]^+$  calculated for  $\text{C}_{20}\text{H}_{27}\text{N}_6\text{O}_9$  495.1834, found 495.1829.

**Fig. S11 Synthesis of Biotin-PEG<sub>2</sub>-DIBO (10)**

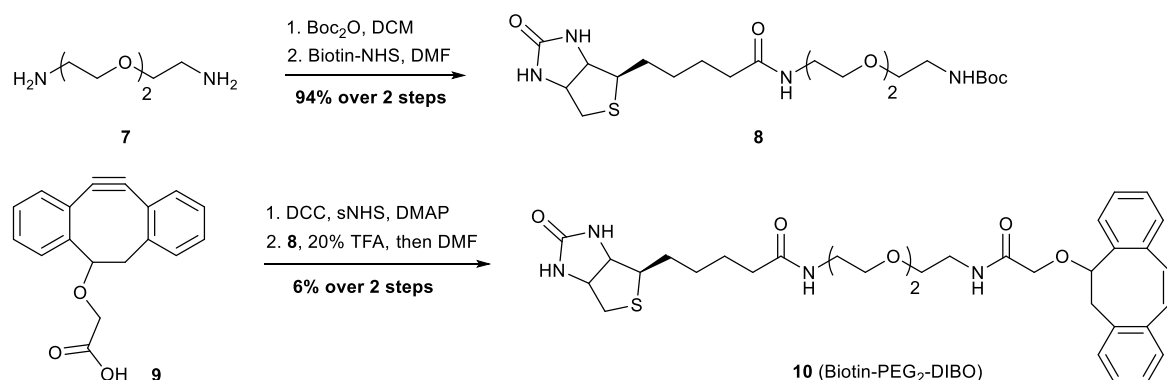

**Fig. S11 Synthesis of Biotin-PEG<sub>2</sub>-DIBO 10.**

**Biotin-PEG<sub>2</sub>-NHBoc (8)** To an ice-cooled solution of 2,2'-(ethane-1,2-diylbis(oxy))bis(ethan-1-amine) **7** (438  $\mu$ L, 3.0 mmol) in  $\text{CH}_2\text{Cl}_2$  (30 mL) was added a solution of di-tert-butyl dicarbonate ( $\text{Boc}_2\text{O}$ , 103  $\mu$ L, 0.45 mmol) in  $\text{CH}_2\text{Cl}_2$  (2 mL) under vigorous stirring. The reaction mixture was further stirred in ice bath for 5 h, and then warmed to room temperature overnight. The mixture was washed with brine twice, dried over anhydrous  $\text{Na}_2\text{SO}_4$ , and concentrated *in vacuo* to afford the crude mono-Boc intermediate. To a solution of the intermediate ( $\leq 0.45$  mmol) in dry DMF (4 mL) was added biotin-NHS powder (102.4 mg, 0.30 mmol) in one portion, then TEA (207  $\mu$ L, 1.5 mmol) was added dropwise. The reaction mixture was stirred at room temperature overnight. The solvent was removed *in vacuo*, and the residue was purified by column chromatography with silica gel (5%-10% MeOH in  $\text{CHCl}_3$ ) to afford compound **8** (134.3 mg, 94%) as a white solid;  $^1\text{H NMR}$  (400 MHz,  $\text{CDCl}_3$ )  $\delta$ (ppm): 6.45 (s, 1H), 6.03 (s, 1H), 5.17 (s, 1H), 5.10 (s, 1H), 4.55-4.47 (m, 1H), 4.36-4.29 (m,

1H), 3.72 (q, 2H,  $J = 7.0$  Hz), 3.67-3.53 (m, 8H), 3.48-3.42 (m, 2H), 3.16 (q, 1H,  $J = 4.6$  Hz), 2.96-2.88 (m, 1H), 2.74 (d, 1H,  $J = 12.8$  Hz), 2.24 (t, 2H,  $J = 7.4$  Hz), 1.80-1.60 (m, 4H), 1.50-1.40 (s, 11H); ESI-MS:  $[M+H]^+$   $C_{21}H_{39}N_4O_6S$  475.4.

**Biotin-PEG<sub>2</sub>-DIBO (10)** Dibenzocyclooctyne acid **9** (DIBO-COOH, 55.7 mg, 0.2 mmol), N-hydroxysulfosuccinimide sodium salt (sNHS, 43.4 mg, 0.2 mmol) and 4-dimethylaminopyridine (DMAP, 1.2 mg, 0.01 mmol) were dissolved in DMF (0.5 mL), to which a solution of dicyclohexylcarbodiimide (DCC, 45.4 mg, 0.22 mmol) in DMF (0.75 mL) was added. The reaction mixture was stirred at room temperature overnight, and then cooled in ice bath for 2 h. The generated solid was removed by filtration, and the filtrate was added Et<sub>2</sub>O (10 mL) under vigorous stirring. The newly generated solid was collected by filtration, washed with Et<sub>2</sub>O, and concentrated *in vacuo* to afford the DIBO intermediate as a white solid (51.2 mg,  $\leq 54\%$ ). **8** (99.7 mg, 0.21 mmol) was dissolved in 1 mL of TFA/CH<sub>2</sub>Cl<sub>2</sub> (1:4), and stirred for 1.5 h. The mixture was concentrated *in vacuo*, and redissolved in dry DMF (1 mL). A solution of the DIBO intermediate (48.0 mg,  $\leq 0.1$  mmol) and TEA (138  $\mu$ L, 1.0 mmol) in dry DMF (1 mL) was added to the reaction mixture. The mixture was stirred at room temperature overnight, and then the solvent was removed *in vacuo*, and the residue was purified by column chromatography with silica gel (1%-10% MeOH in CH<sub>2</sub>Cl<sub>2</sub>) to afford compound **10** (7.6 mg, 6% over 2 steps) as a white solid; <sup>1</sup>H NMR (400 MHz, MeOH-*d*<sub>4</sub>)  $\delta$ (ppm): 7.69 (d, 1H,  $J = 7.8$  Hz), 7.55 (d, 1H,  $J = 7.2$  Hz), 7.47-7.41 (m, 1H), 7.39-7.30 (m, 5H), 4.49-4.43 (m, 1H), 4.29-4.21 (m, 2H), 4.06 (s, 2H), 3.61 (s, 4H), 3.53 (m, 4H), 3.43 (m, 2H), 3.37-3.33 (m, 3H), 3.19-3.10 (m, 1H), 2.93-2.85 (m, 1H), 2.81-2.73 (m, 1H), 2.68 (d, 1H,  $J = 12.7$  Hz), 2.18 (t, 2H,  $J = 7.4$  Hz), 1.76-1.50 (m, 4H), 1.40 (q, 2H,  $J = 7.6$  Hz); HRMS:  $[M+H]^+$  calculated for C<sub>34</sub>H<sub>43</sub>N<sub>4</sub>O<sub>6</sub>S 635.2898, found 635.2900.

#### Fig. S12 Synthesis of Biotin-N<sub>3</sub> (13)

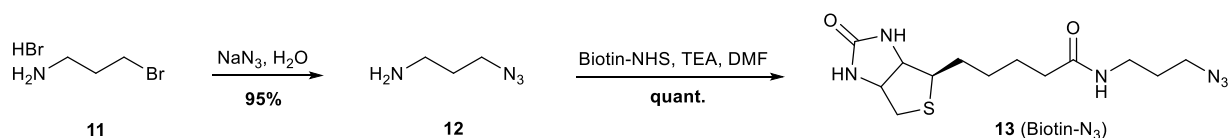

Fig. S12 Synthesis Of Biotin-N<sub>3</sub> **13**.

**3-azidopropan-1-amine (12)** To an aqueous solution of 3-bromopropan-1-amine hydrobromide **11** (3.28 g, 1.5 M), was added an aqueous solution of NaN<sub>3</sub> (3.25 g, 3 M). The reaction mixture was heated to reflux and stirred for 16 h, then cooled in the ice bath. KOH pellets (4 g, 71 mmol) was added to the mixture under vigorous stirring, and the mixture was extracted with Et<sub>2</sub>O three times. The combined organic phase was dried over anhydrous Na<sub>2</sub>SO<sub>4</sub>, and concentrated *in vacuo* to afford compound **12** (1.42 g, 95%) as a light yellow oil; <sup>1</sup>H NMR (400 MHz, CDCl<sub>3</sub>)  $\delta$ (ppm): 3.37 (t, 2H,  $J = 6.7$ Hz), 2.80 (t, 2H,  $J = 6.8$ Hz), 1.73 (m, 2H), 1.5-1.0 (s, 2H); <sup>13</sup>C NMR (101 MHz, CDCl<sub>3</sub>)  $\delta$ (ppm) 49.2, 39.4, 32.5.

**Biotin-N<sub>3</sub> (13)** To a solution of biotin-NHS (102.4 mg, 0.30 mmol) in dry DMF (1 mL), was added **12** (89  $\mu$ L, 0.90 mmol) and TEA (208  $\mu$ L, 1.50 mmol). The reaction mixture was stirred at room temperature overnight. The solvent was removed *in vacuo*, and the residue was purified by column chromatography with silica gel (3%-15% MeOH in CHCl<sub>3</sub>) to afford compound **13** (98.0 mg, quant.) as a white solid; <sup>1</sup>H NMR (400 MHz, MeOH-*d*<sub>4</sub>): 4.52-4.45 (m, 1H), 4.33-4.26 (m, 1H), 3.35 (t, 2H,  $J = 6.7$  Hz), 3.24 (t, 2H,  $J = 6.7$  Hz), 3.24-3.16 (m, 1H), 2.96-2.88 (m, 1H), 2.70 (d, 1H,  $J = 12.7$  Hz), 2.20 (t, 2H,  $J = 7.4$  Hz), 1.80-1.53 (m, 6H), 1.44 (q, 2H,  $J = 7.7$  Hz); <sup>13</sup>C NMR (101 MHz, MeOH-*d*<sub>4</sub>)  $\delta$ (ppm) 174.8, 164.8, 62.0, 60.2, 55.6, 48.7, 39.6, 36.3, 35.4, 28.4, 28.4, 28.1, 25.5, 24.9; HRMS:  $[M+H]^+$  calculated for C<sub>13</sub>H<sub>23</sub>N<sub>6</sub>O<sub>2</sub>S 327.1598, found 327.1592.

Fig. S13  $^1\text{H}$  NMR spectrum of NHS- $\text{N}_3$  (2)

NHS- $\text{N}_3$  (2)

$^1\text{H}$  NMR (400 MHz,  $\text{CDCl}_3$ )  $\delta$ : 4.42 (t, 2H,  $J = 6.1$  Hz), 3.47 (t, 2H,  $J = 6.6$  Hz), 2.84 (s, 4H), 2.01 (m, 2H).

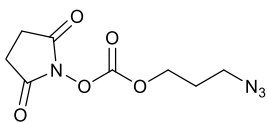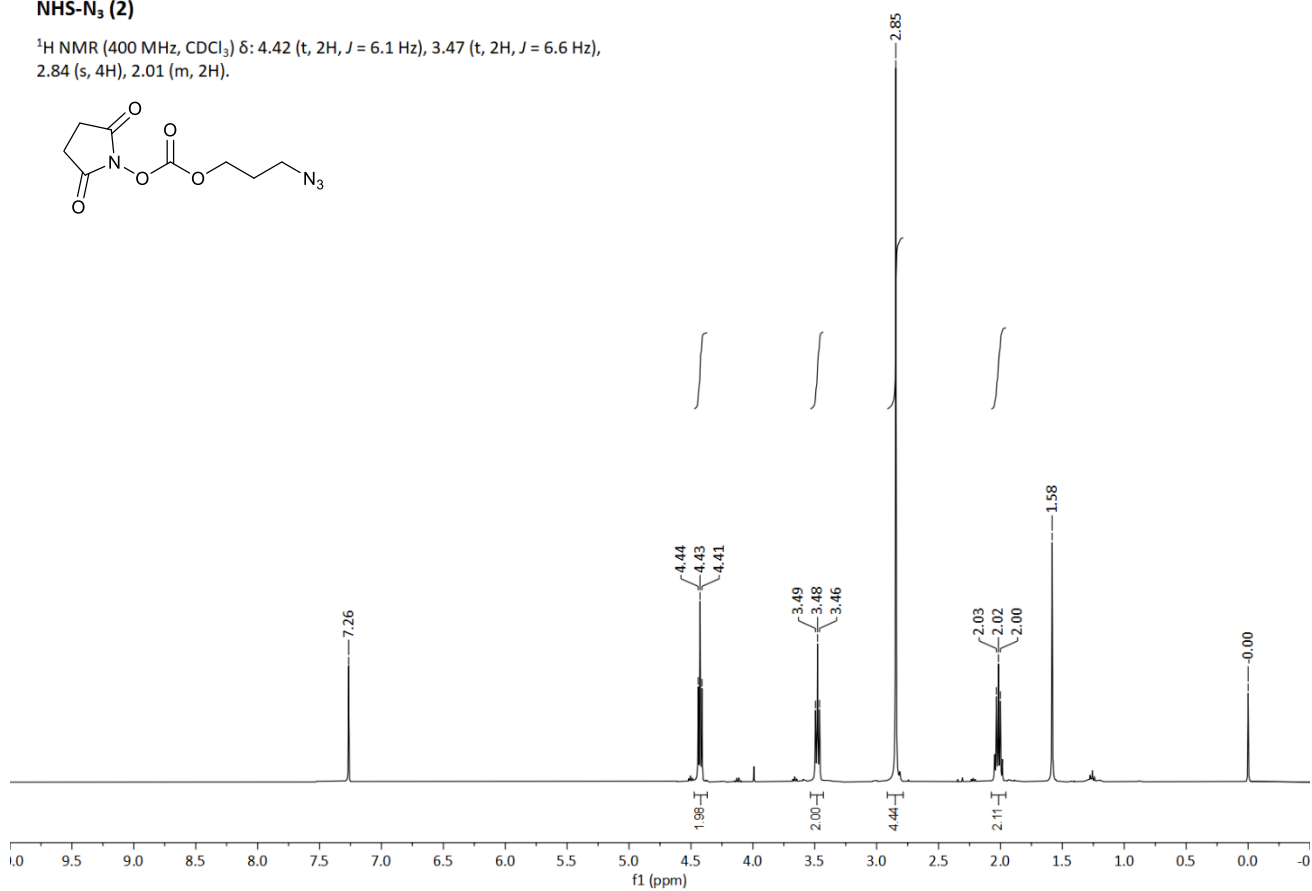

Fig. S13  $^1\text{H}$  NMR spectrum of NHS- $\text{N}_3$  2

Fig. S14 <sup>13</sup>C NMR spectrum of NHS-N<sub>3</sub> (2)

NHS-N<sub>3</sub> (2)

<sup>13</sup>C NMR (101 MHz, CDCl<sub>3</sub>) δ 168.60, 151.50, 68.10, 47.45, 27.99, 25.47.

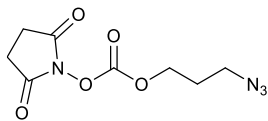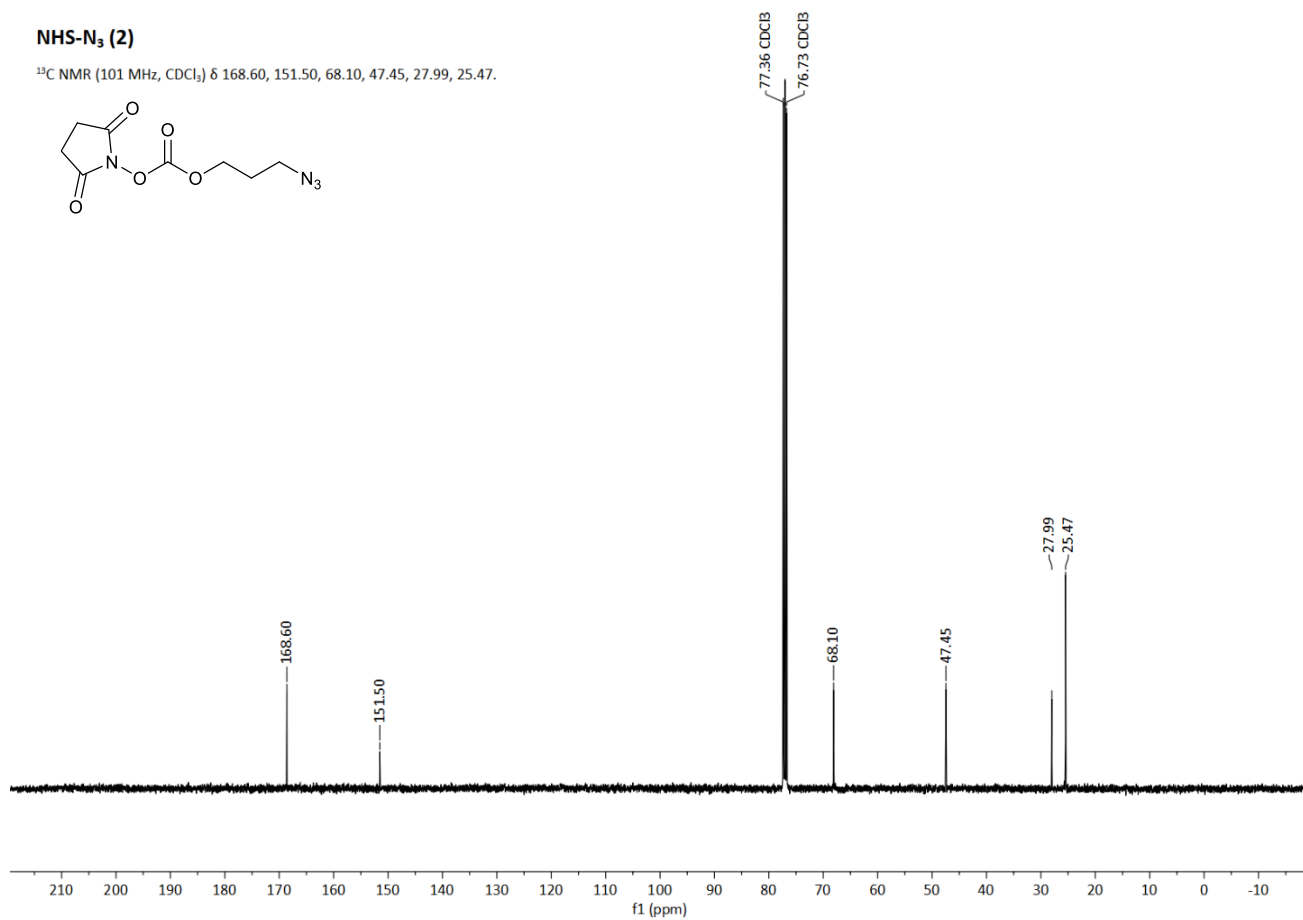

Fig. S14 <sup>13</sup>C NMR spectrum of NHS-N<sub>3</sub> 2

Fig. S15 <sup>1</sup>H NMR spectrum of NHS-pAz (6)

NHS-pAz (6)

<sup>1</sup>H NMR (400 MHz, CDCl<sub>3</sub>) δ: 9.00 (d, 1H, *J* = 2.0 Hz), 8.19 (dd, 1H, *J* = 2.3 Hz, 8.1 Hz), 7.43 (d, 1H, *J* = 8.1 Hz), 7.09 (s, 1H), 4.54 (s, 2H), 4.44 (m, 2H), 3.75 (m, 2H), 3.71-3.64 (m, 12H), 2.83 (s, 4H).

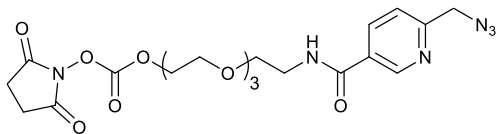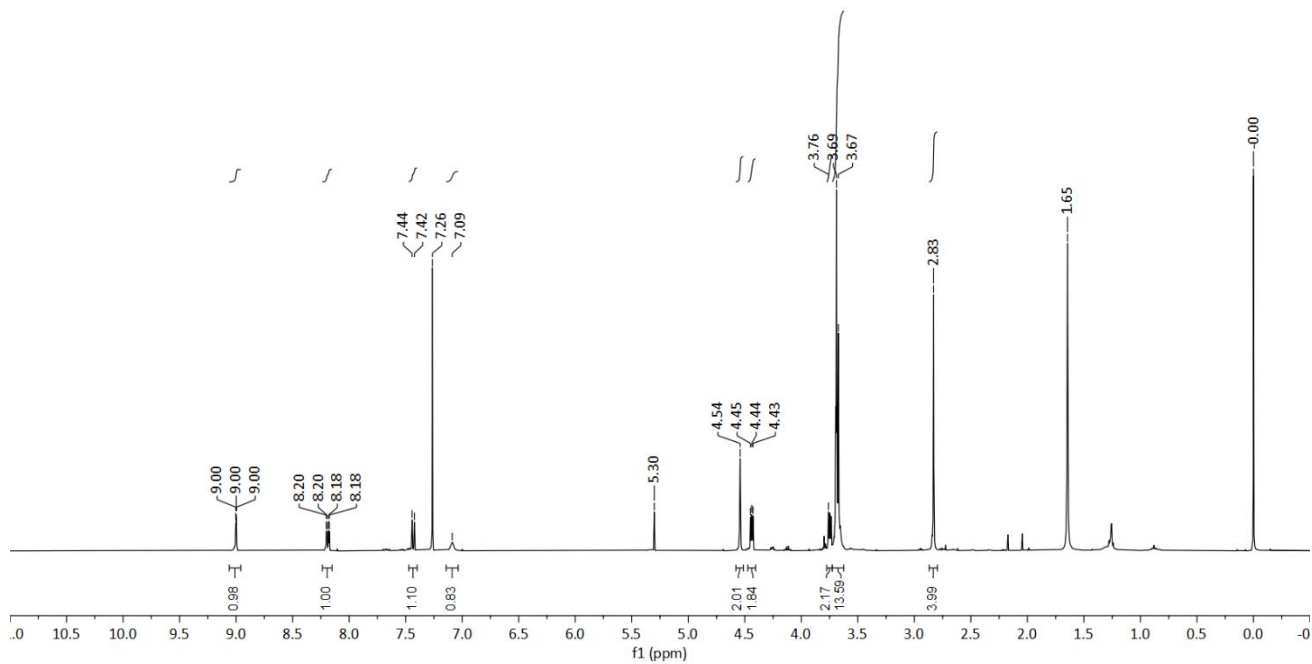

Fig. S15 <sup>1</sup>H NMR spectrum of NHS-pAz 6





Fig. S17 <sup>1</sup>H NMR spectrum of Biotin-N<sub>3</sub> (13)

**Biotin-N<sub>3</sub> (13)**

<sup>1</sup>H NMR (400 MHz, MeOH-d<sub>4</sub>): 4.52-4.45 (m, 1H), 4.33-4.26 (m, 1H), 3.35 (t, 2H, *J* = 6.7 Hz), 3.24 (t, 2H, *J* = 6.7 Hz), 3.24-3.16 (m, 1H), 2.96-2.88 (m, 1H), 2.70 (d, 1H, *J* = 12.7 Hz), 2.20 (t, 2H, *J* = 7.4 Hz), 1.80-1.53 (m, 6H), 1.44 (q, 2H, *J* = 7.7 Hz).

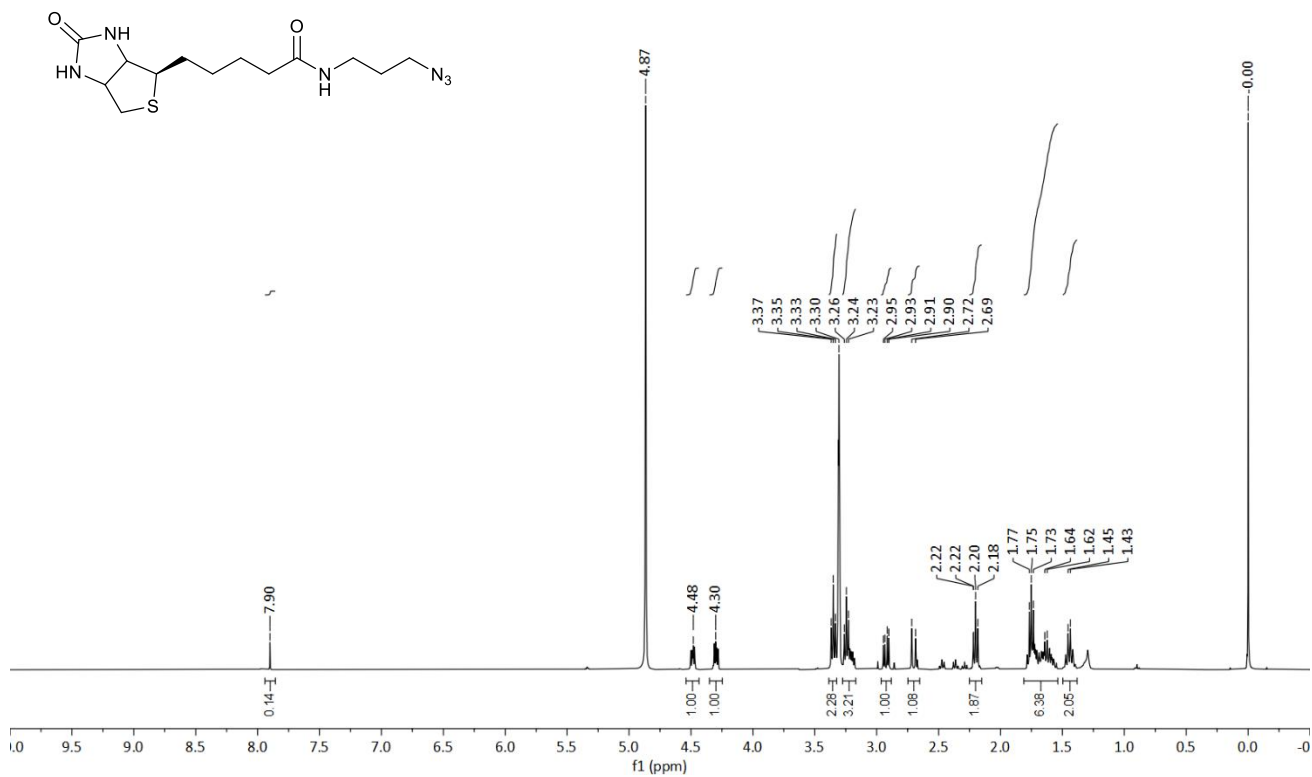

Fig. S17 <sup>1</sup>H NMR spectrum of Biotin-N<sub>3</sub> 13

Fig. S18  $^{13}\text{C}$  NMR spectrum of Biotin- $\text{N}_3$  (13)

Biotin- $\text{N}_3$  (13)

$^{13}\text{C}$  NMR (101 MHz, MeOH- $d_4$ )  $\delta$  174.78, 164.75, 61.99, 60.23, 55.62, 48.69, 39.64, 36.28, 35.38, 28.40, 28.34, 28.09, 25.45, 24.87.

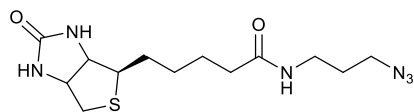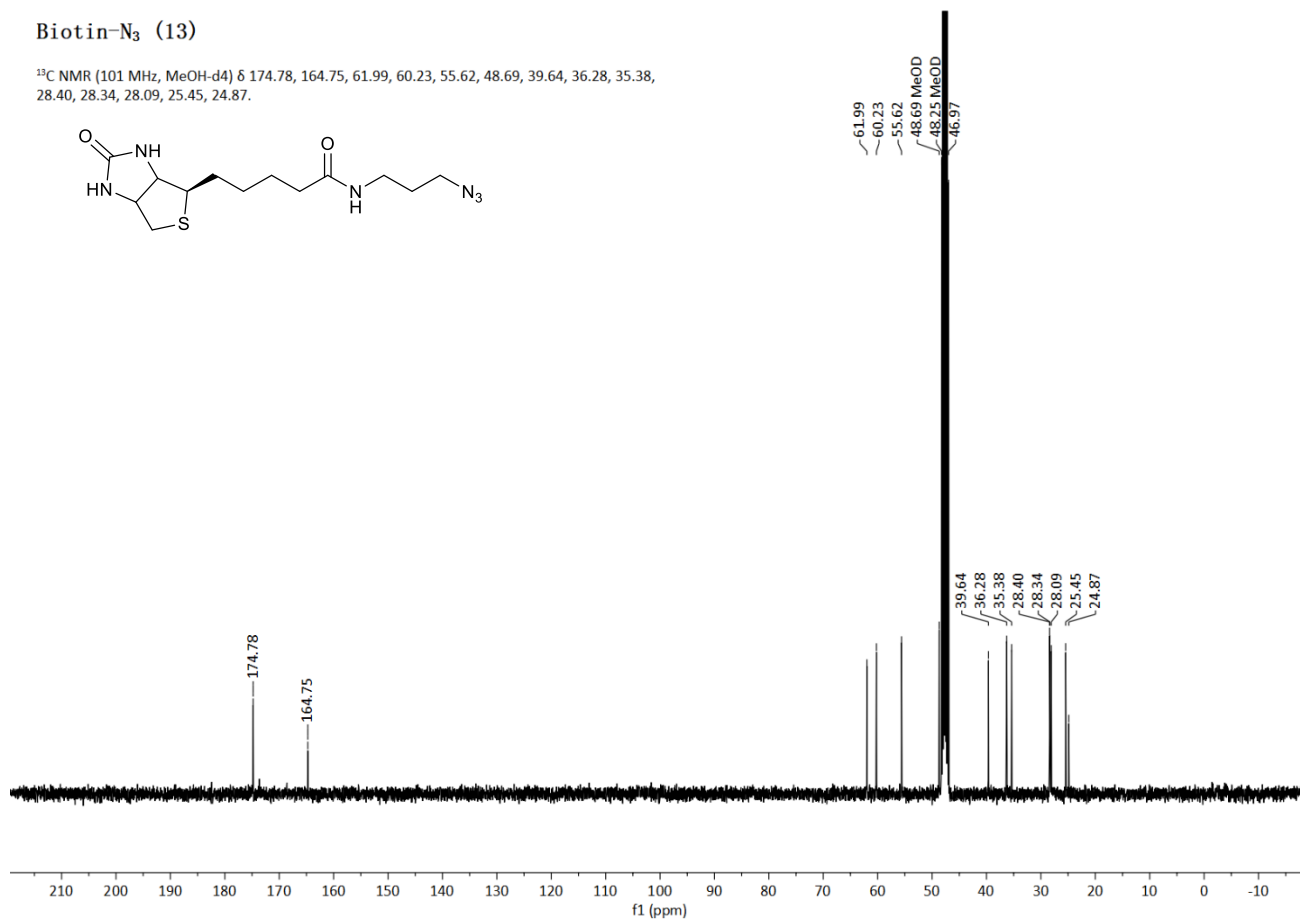

Fig. S18  $^{13}\text{C}$  NMR spectrum of Biotin- $\text{N}_3$  13

Supplementary References

1. F. C. Wu, H. Zhang, Q. Zhou, M. Wu, Z. Ballard, Y. Tian, J. Y. Wang, Z. W. Niu, Y. Huang, *Chemical communications (Cambridge, England)*, 2014, **50**, 4007.
2. C. Uttamapinant, A. Tangpeerachaikul, S. Grecian, S. Clarke, U. Singh, P. Slade, K. R. Gee, A. Y. Ting, *Angewandte Chemie International Edition*, 2012, **51**, 5852.
